# Supplementary material
Source: PubMed Central journal article supplement (PMC2851785)
Supplement: 0907841107_pnas.0907841107_SI.pdf [file 0907841107_pnas.0907841107_SI.pdf]

# Supporting Information

Kovacs et al. 10.1073/pnas.0907841107

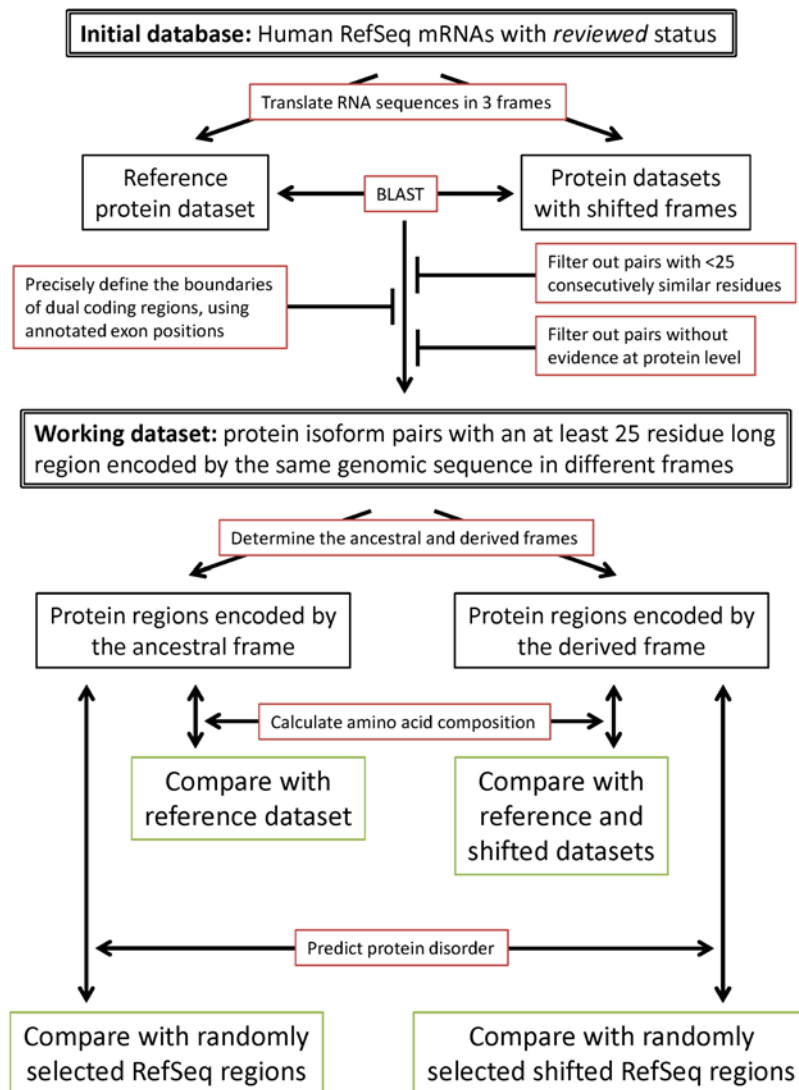

**Fig. S1.** Outline of the procedure applied for selecting data and obtaining results. In the flowchart, simple black frames mark temporary datasets, whereas double black frames mark working datasets. Procedures, filters, and calculations applied to the datasets are depicted with red frames, whereas methods directly providing results are framed green.

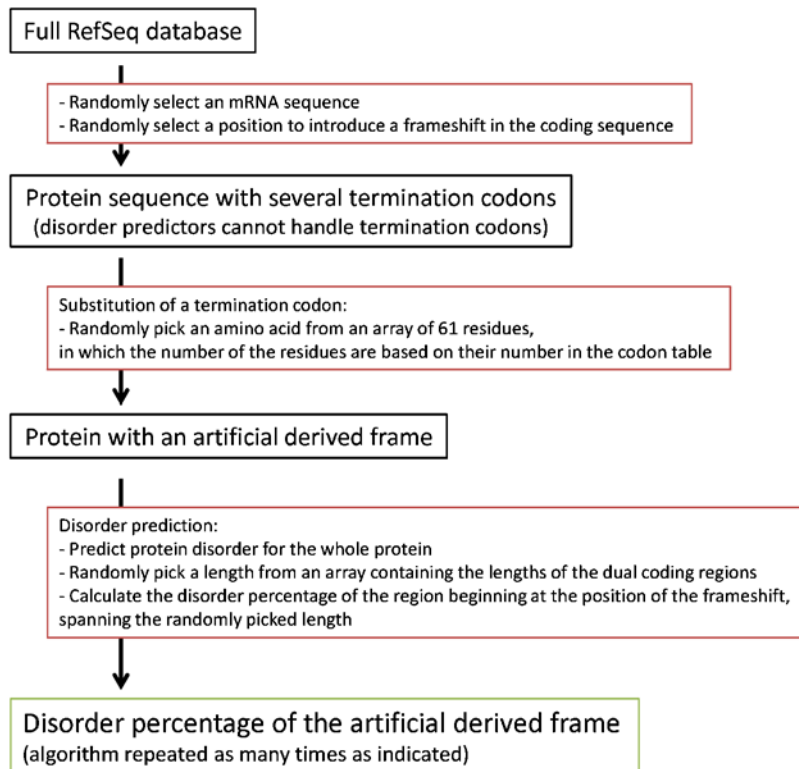

**Fig. S2.** Generation of the random shifted control dataset for disorder prediction. Black boxes indicate initial and temporary sequences, red boxes indicate applied transformations, and the result is framed green.
